# Supplementary material for: Linked Patient and Provider Impressions of Outpatient Teleneurology Encounters
Source: bioRxiv or medRxiv preprint supplement (doi:10.1101/2022.12.07.22283213), 2022-12-09
Supplement: Supplementary file [file media-1.pdf]

# Supplementary Tables/Figures

## Supplementary Table 1. Patient Teleneurology Questionnaire as Completed via the REDCap Survey Tool

### Information

Subject

MRN

Gender

- ☐ Male  
☐ Female

Age

Race

### Questionnaire

Who is answering the questionnaire?

- ☐ Patient  
☐ Caregiver  
☐ Patient & Caregiver  
☐ Other

If other,

What did you like best about the telemedicine visit?

Do you think there were any advantages for your doctor getting to see you in your home environment?

What could be improved about the telemedicine visit?

What device did you use?

- ☐ Phone  
☐ Desktop  
☐ Laptop  
☐ Tablet  
☐ Other

If other,

What would you have done for this visit if telemedicine was not available?

- ☐ Phone Call  
☐ Seen a different doctor in person  
☐ Not seen a doctor

FOLLOW-UP PATIENTS ONLY:

Did your doctor spend less time, more time, or the same amount of time with you as they usually do in person?

- ☐ Less time  
☐ More time  
☐ Same amount of time

Did you have another person with you for the visit?

- ☐ Yes  
☐ No

If yes, who was it?

- ☐ Husband/Wife  
☐ Adult Child  
☐ Friend  
☐ Professional Caregiver  
☐ Other

If other,

|                                                                                                                                                                     |                                                                                                                                                                                   |
|---------------------------------------------------------------------------------------------------------------------------------------------------------------------|-----------------------------------------------------------------------------------------------------------------------------------------------------------------------------------|
| I saved time using telemedicine compared to an in-person visit.                                                                                                     | <input type="radio"/> Strongly Agree <input type="radio"/> Agree<br><input type="radio"/> Neutral <input type="radio"/> Disagree<br><input type="radio"/> Strongly Disagree       |
| If agree or strongly agree, about how much time did you save?                                                                                                       | _____                                                                                                                                                                             |
| I felt comfortable asking my doctor questions about my diagnoses, treatment options, and research via video.                                                        | <input type="radio"/> Strongly Agree <input type="radio"/> Agree<br><input type="radio"/> Neutral <input type="radio"/> Disagree<br><input type="radio"/> Strongly Disagree       |
| My doctor was able to understand my symptoms and problems as well via video as they would have in person.                                                           | <input type="radio"/> Strongly Agree <input type="radio"/> Agree<br><input type="radio"/> Neutral <input type="radio"/> Disagree<br><input type="radio"/> Strongly Disagree       |
| I understood my plan of care and provider recommendations by the end of the visit.                                                                                  | <input type="radio"/> Strongly Agree <input type="radio"/> Agree<br><input type="radio"/> Neutral <input type="radio"/> Disagree<br><input type="radio"/> Strongly Disagree       |
| What was the plan after the visit, or the doctor's recommendations at the end of the visit, as you recall it?                                                       | _____                                                                                                                                                                             |
| I was satisfied with the care provided during my telemedicine visit.                                                                                                | <input type="radio"/> Strongly Agree<br><input type="radio"/> Agree<br><input type="radio"/> Neutral<br><input type="radio"/> Disagree<br><input type="radio"/> Strongly Disagree |
| For future visits with your provider, would you like to use in-person visits, telemedicine visits, or a combination of the two?                                     | <input type="radio"/> In-person Visits<br><input type="radio"/> Telemedicine Visits<br><input type="radio"/> Combination                                                          |
| Would you have preferred to go to a local clinic where someone could have set up the technology for you (assuming corona virus was not a risk)?                     | <input type="radio"/> Yes<br><input type="radio"/> No<br><input type="radio"/> Unsure                                                                                             |
| Would you be more likely to participate in a support group if it were available via video versus in-person (so you didn't have to drive to it)?                     | <input type="radio"/> Yes<br><input type="radio"/> No<br><input type="radio"/> Unsure                                                                                             |
| I would use telemedicine again for future visits.                                                                                                                   | <input type="radio"/> Strongly Agree<br><input type="radio"/> Agree<br><input type="radio"/> Neutral<br><input type="radio"/> Disagree<br><input type="radio"/> Strongly Disagree |
| I prefer in-person visits to telemedicine visits.                                                                                                                   | <input type="radio"/> Strongly Agree<br><input type="radio"/> Agree<br><input type="radio"/> Neutral<br><input type="radio"/> Disagree<br><input type="radio"/> Strongly Disagree |
| If your primary doctor referred you to a specialist in the city, would you be more likely to see them if they could do a video visit instead of an in-person visit? | <input type="radio"/> Strongly Agree<br><input type="radio"/> Agree<br><input type="radio"/> Neutral<br><input type="radio"/> Disagree<br><input type="radio"/> Strongly Disagree |

8 **Supplementary Table 2. Summary of Patient Cohort Primary Diagnosis Categories**

| Diagnosis Category                                              | Primary Diagnosis                       |         |
|-----------------------------------------------------------------|-----------------------------------------|---------|
| <b>PD/Parkinsonism Movement Disorder</b><br><b>66 (48%)</b>     | Parkinson's Disease                     | 59 (89) |
|                                                                 | Secondary Parkinsonism                  | 3 (5)   |
|                                                                 | Atypical Parkinsonism                   | 4 (6)   |
|                                                                 | Ataxia / Cerebellar Dysfunction         | 10 (24) |
| <b>Non-PD/Parkinsonism Movement Disorder</b><br><b>42 (31%)</b> | Dystonia                                | 4 (10)  |
|                                                                 | Chorea                                  | 6 (14)  |
|                                                                 | Tremor                                  | 10 (24) |
|                                                                 | Functional Movement Disorder            | 3 (7)   |
|                                                                 | Gait Disorder                           | 1 (2)   |
|                                                                 | Hereditary Spastic Paraplegia           | 2 (5)   |
|                                                                 | Restless Legs Syndrome                  | 1 (2)   |
|                                                                 | Synkinesis                              | 1 (2)   |
|                                                                 | Tardive Dyskinesia                      | 1 (2)   |
|                                                                 | Abnormal Involuntary Movement           | 1 (2)   |
|                                                                 | Neurogenetics Evaluation for NBIA       | 1 (2)   |
|                                                                 | Neck Pain                               | 2 (7)   |
| <b>Non-Movement Neurological Disorder</b><br><b>29 (21%)</b>    | Awareness alteration                    | 1 (3)   |
|                                                                 | Dementia without behavioral disturbance | 1 (3)   |
|                                                                 | Facial Weakness                         | 1 (3)   |
|                                                                 | Meningioma                              | 1 (3)   |
|                                                                 | Headache                                | 14 (48) |
|                                                                 | Myasthenia gravis                       | 1 (3)   |
|                                                                 | Neuropathy                              | 5 (17)  |
|                                                                 | Stuttering                              | 1 (3)   |
|                                                                 | Trigeminal Neuralgia                    | 1 (3)   |
|                                                                 | Winging of Scapula                      | 1 (3)   |

Data reported as N (%) of total cohort.

Abbreviations: *PD*, *Parkinson's Disease*.

10 **Supplementary Table 3. Summary of Patient Impressions of Teleneurology Experience**

| Category                          | Question                                                                                                                               | Responses                                                                                                                   |
|-----------------------------------|----------------------------------------------------------------------------------------------------------------------------------------|-----------------------------------------------------------------------------------------------------------------------------|
| <b>Ease of Joining Visit</b>      | <i>It was easy to connect for the telemedicine visit.</i>                                                                              | <b>StrD:</b> 5 (3.65%)<br><b>D:</b> 8 (5.84%)<br><b>N:</b> 10 (7.30%)<br><b>A:</b> 64 (46.72%)<br><b>StrA:</b> 50 (36.50%)  |
| <b>Patient Comfort</b>            | <i>I felt comfortable asking my doctor questions about my diagnoses, treatment options, and research via video.</i>                    | <b>StrD:</b> 0<br><b>D:</b> 0<br><b>N:</b> 6 (4.38%)<br><b>A:</b> 31 (22.63%)<br><b>StrA:</b> 100 (72.99%)                  |
| <b>† Visit Summary</b>            | <i>I understood my plan of care and provider recommendations by the end of the visit.</i>                                              | <b>StrD:</b> 0<br><b>D:</b> 0<br><b>N:</b> 3 (2.19%)<br><b>A:</b> 57 (41.61%)<br><b>StrA:</b> 73 (53.28%)                   |
| <b>Quality of Care</b>            | <i>I was satisfied with the care provided during my telemedicine visit.</i>                                                            | <b>StrD:</b> 2 (1.46%)<br><b>D:</b> 0<br><b>N:</b> 9 (6.57%)<br><b>A:</b> 50 (36.50%)<br><b>StrA:</b> 76 (55.47%)           |
| <b>†† Money Saved</b>             | <i>I saved money using telemedicine compared to an in-person visit.</i>                                                                | <b>StrD:</b> 1 (0.73%)<br><b>D:</b> 6 (4.38%)<br><b>N:</b> 38 (27.74%)<br><b>A:</b> 48 (35.04%)<br><b>StrA:</b> 44 (32.12%) |
| <b>††† Time Saved</b>             | <i>I saved time using telemedicine compared to an in-person visit.</i>                                                                 | <b>StrD:</b> 0<br><b>D:</b> 1 (0.73%)<br><b>N:</b> 11 (8.03%)<br><b>A:</b> 51 (37.23%)<br><b>StrA:</b> 74 (54.01%)          |
| <b>†††† Future Care</b>           | <i>I would use telemedicine again for future visits.</i>                                                                               | <b>StrD:</b> 0<br><b>D:</b> 5 (6.76%)<br><b>N:</b> 4 (5.41%)<br><b>A:</b> 28 (37.84%)<br><b>StrA:</b> 37 (50.00%)           |
| <b>††††† Model of Future Care</b> | <i>For future visits with your provider, would you like to use in-person visits, telemedicine visits, or a combination of the two?</i> | <b>In-Person:</b> 15 (23.08%)<br><b>Telemedicine:</b> 9 (13.85%)<br><b>Combination:</b> 41 (63.08%)                         |

Unless specified, questions above were asked with a 5-point Likert-scale, with response options including Strongly Disagree (StrD), Disagree (D), Neutral (N), Agree (A), and Strongly Agree (StrA). Data reported as N (%) of total cohort.

† 4 (2.92%) patient responses missing.

†† Average dollar amount saved: \$36.65, SD ± 43.58

††† Average self-reported time saved: 132 minutes, SD ± 152

†††† A subset of N=74 (54.01%) patients were asked this question.

††††† A subset of N=65 (47.44%) patients were asked this question.

12 **Supplementary Table 4. Patient Impressions About the Quality of the History Obtained**  
 13 **During the Visit**

| Whole Cohort                                            | Worse   | Same     | No. Responses |
|---------------------------------------------------------|---------|----------|---------------|
|                                                         | 17 (12) | 120 (88) | 137           |
| <b>Gender</b>                                           |         |          |               |
| Male                                                    | 10 (16) | 54 (84)  | 64            |
| Female                                                  | 7 (10)  | 66 (88)  | 73            |
| <b>Age Group (Years)</b>                                |         |          |               |
| 18-29                                                   | 2 (40)  | 3 (60)   | 5             |
| 30-49                                                   | 2 (11)  | 16 (89)  | 18            |
| 50-69                                                   | 8 (12)  | 60 (88)  | 68            |
| 70-89                                                   | 5 (11)  | 41 (89)  | 46            |
| <b>Distance from Neurology Clinic (miles)</b>           |         |          |               |
| 0-19                                                    | 9 (11)  | 74 (89)  | 83            |
| 20-39                                                   | 5 (16)  | 26 (84)  | 31            |
| > 40                                                    | 3 (13)  | 20 (87)  | 23            |
| <b>Visit Type</b>                                       |         |          |               |
| Existing Visit                                          | 13 (13) | 88 (87)  | 101           |
| New Visit                                               | 4 (11)  | 32 (89)  | 36            |
| <b>Primary Diagnosis Category</b>                       |         |          |               |
| PD/Parkinsonism Movement Disorder                       | 2 (7)   | 27 (93)  | 29            |
| Non-PD/Parkinsonism Movement Disorder                   | 8 (19)  | 34 (81)  | 42            |
| Non-Movement Neurological Disorder                      | 7 (11)  | 59 (89)  | 66            |
| Data reported as N (%) of total cohort.                 |         |          |               |
| Abbreviations: <i>PD</i> , <i>Parkinson's Disease</i> . |         |          |               |

**Supplementary Table 5. Patient Impressions About the Patient-Provider Relationship  
During Visit**

| Whole Cohort                                   | Poor  | Neutral/Fair | Good or Excellent | No. Responses |
|------------------------------------------------|-------|--------------|-------------------|---------------|
|                                                | 2 (1) | 9 (7)        | 126 (92)          | 137           |
| <b>Gender</b>                                  |       |              |                   |               |
| Male                                           | 2 (3) | 5 (7)        | 66 (90)           | 73            |
| Female                                         | 0 (0) | 4 (6)        | 60 (94)           | 64            |
| <b>Age Group (Years)</b>                       |       |              |                   |               |
| 18-29                                          | 0 (0) | 1 (20)       | 4 (80)            | 5             |
| 30-49                                          | 0 (0) | 1 (6)        | 17 (94)           | 18            |
| 50-69                                          | 1 (1) | 4 (6)        | 63 (93)           | 68            |
| 70-89                                          | 1 (2) | 3 (7)        | 42 (91)           | 46            |
| <b>Distance from Neurology Clinic (miles)</b>  |       |              |                   |               |
| 0-19                                           | 2 (2) | 4 (5)        | 77 (93)           | 83            |
| 20-39                                          | 0 (0) | 2 (6)        | 29 (94)           | 31            |
| > 40                                           | 0 (0) | 3 (13)       | 20 (87)           | 23            |
| <b>Visit Type</b>                              |       |              |                   |               |
| Existing Visit                                 | 1 (1) | 8 (8)        | 92 (91)           | 101           |
| New Visit                                      | 1 (3) | 1 (3)        | 34 (94)           | 36            |
| <b>Primary Diagnosis Category</b>              |       |              |                   |               |
| PD/Parkinsonism Movement Disorder              | 0 (0) | 1 (3)        | 28 (97)           | 29            |
| Non-PD/Parkinsonism Movement Disorder          | 2 (5) | 2 (5)        | 38 (90)           | 42            |
| Non-Movement Neurological Disorder             | 0 (0) | 6 (9)        | 60 (91)           | 66            |
| Data reported as N (%) of total cohort.        |       |              |                   |               |
| Abbreviations: <i>PD, Parkinson's Disease.</i> |       |              |                   |               |

18 **Supplementary Table 6. Patient Impressions About the Time Required During Visit**

| Whole Cohort                                   | Less    | Same    | More   | No. Responses |
|------------------------------------------------|---------|---------|--------|---------------|
|                                                | 17 (19) | 64 (71) | 9 (10) | 90            |
| <b>Gender</b>                                  |         |         |        |               |
| Male                                           | 8 (17)  | 32 (70) | 6 (13) | 46            |
| Female                                         | 9 (20)  | 32 (73) | 3 (7)  | 44            |
| <b>Age Group (Years)</b>                       |         |         |        |               |
| 18-29                                          | 0 (0)   | 2 (100) | 0 (0)  | 2             |
| 30-49                                          | 1 (10)  | 9 (90)  | 0 (0)  | 10            |
| 50-69                                          | 7 (16)  | 33 (73) | 5 (11) | 45            |
| 70-89                                          | 9 (27)  | 20 (61) | 4 (12) | 33            |
| <b>Distance from Neurology Clinic (miles)</b>  |         |         |        |               |
| 0-19                                           | 11 (19) | 39 (68) | 7 (12) | 57            |
| 20-39                                          | 2 (11)  | 15 (79) | 2 (11) | 19            |
| > 40                                           | 4 (29)  | 10 (71) | 0 (0)  | 14            |
| <b>Visit Type</b>                              |         |         |        |               |
| Existing Visit                                 | 17 (19) | 64 (71) | 9 (10) | 90            |
| New Visit                                      | 0 (0)   | 0 (0)   | 0 (0)  | 0             |
| <b>Primary Diagnosis Category</b>              |         |         |        |               |
| PD/Parkinsonism Movement Disorder              | 1 (6)   | 13 (76) | 3 (18) | 17            |
| Non-PD/Parkinsonism Movement Disorder          | 6 (30)  | 12 (60) | 2 (10) | 20            |
| Non-Movement Neurological Disorder             | 10 (19) | 39 (74) | 4 (8)  | 53            |
| Data reported as N (%) of total cohort.        |         |         |        |               |
| Abbreviations: <i>PD, Parkinson's Disease.</i> |         |         |        |               |

20 **Supplementary Table 7. Patient Impressions About the Overall Quality of the Visit**

| Whole Cohort                                  | Worse   | Same or Better | No. Responses |
|-----------------------------------------------|---------|----------------|---------------|
|                                               | 25 (20) | 103 (80)       | 128           |
| <b>Gender</b>                                 |         |                |               |
| Male                                          | 14 (20) | 55 (80)        | 69            |
| Female                                        | 11 (19) | 48 (81)        | 59            |
| <b>Age Group (Years)</b>                      |         |                |               |
| 18-29                                         | 1 (20)  | 4 (80)         | 5             |
| 30-49                                         | 3 (18)  | 14 (82)        | 17            |
| 50-69                                         | 13 (20) | 51 (80)        | 64            |
| 70-89                                         | 8 (19)  | 34 (81)        | 42            |
| <b>Distance from Neurology Clinic (miles)</b> |         |                |               |
| 0-19                                          | 18 (23) | 60 (77)        | 78            |
| 20-39                                         | 4 (14)  | 24 (86)        | 28            |
| > 40                                          | 3 (14)  | 19 (86)        | 22            |
| <b>Visit Type</b>                             |         |                |               |
| Existing Visit                                | 19 (19) | 81 (81)        | 100           |
| New Visit                                     | 6 (21)  | 22 (79)        | 28            |
| <b>Primary Diagnosis Category</b>             |         |                |               |
| PD/Parkinsonism Movement Disorder             | 4 (14)  | 24 (86)        | 28            |
| Non-PD/Parkinsonism Movement Disorder         | 9 (24)  | 29 (76)        | 38            |
| Non-Movement Neurological Disorder            | 12 (19) | 50 (81)        | 62            |

Data reported as N (%) of total cohort.  
Abbreviations: *PD*, *Parkinson's Disease*.
